# Supplementary material for: Chitosan-Sulfated Titania Composite Membranes with Potential Applications in Fuel Cell: Influence of Cross-Linker Nature
Source: PubMed Central journal article supplement (PMC7284654; doi:10.3390/polym12051125), 2020-05-14
Supplement: polymers-12-01125-s001.pdf [file polymers-12-01125-s001.pdf]

## Supplementary Materials:

## Chitosan-Sulfated Titania Composite Membranes with Potential Applications in Fuel Cell: Influence of Cross-Linker Nature

Andra-Cristina Humelnicu <sup>1</sup>, Petrisor Samoila <sup>1,\*</sup>, Mihai Asandulesa <sup>1</sup>, Corneliu Cojocaru <sup>1</sup>, Adrian Bele <sup>1</sup>, Adriana T. Marinoiu <sup>2</sup>, Ada Sacca <sup>3</sup> and Valeria Harabagiu <sup>1,\*</sup>

<sup>1</sup> “Petru Poni” Institute of Macromolecular Chemistry, Aleea Grigore Ghica Voda 41A, 700487 Iasi, Romania; humelnicu.andra@icmpp.ro (A.-C.H.); asandulesa.mihai@icmpp.ro (M.A.); cojocaru.corneliu@icmpp.ro (C.C.); bele.adrian@icmpp.ro (A.B.)

<sup>2</sup> National Research and Development Institute for Cryogenics and Isotopic Technologies – ICSI Rm. Valcea, 240050, Romania; adriana.marinoiu@icsi.ro

<sup>3</sup> National Research Council of Italy, Institute for Advanced Energy Technologies “Nicola Giordano” (CNR-ITAE), via S. Lucia sopra Contesse 5, 98126 – Messina, Italy; [ada.sacca@itae.cnr.it](mailto:ada.sacca@itae.cnr.it)

\* Correspondence: samoila.petrisor@icmpp.ro (P.S.); hvaleria@icmpp.ro (V.H.); Tel.: +40-232-217454

### Determination of molecular weight of chitosan

Molecular weight of the chitosan was determined using an Ubbelohde viscosimeter (Oa capillary,  $K = 0.005 \text{ mm}^2/\text{s}^2$ ) at  $25 \pm 0.05 \text{ }^\circ\text{C}$ . Chitosan was dissolved in an aqueous solution of 2% acetic acid and 0.2 M sodium acetate (1/1 V/V) to obtain different chitosan concentrations (0.02; 0.04; 0.06; 0.08; 0.1; 0.12 and 0.15 g/dL). To ensure the equilibration of the polymer solution, the solutions were kept for 24 hours at  $30 \text{ }^\circ\text{C}$ . The molecular weight was calculated with Mark-Houwink Equation (S1) by using  $k = 13.8 \times 10^{-5}$  and  $a = 0.85$  (Kasaai, *Carbohydrate Polymers* 68 (2007) 477–488).

$$[\eta] = k \cdot M_v^a \quad (\text{S1})$$

$[\eta]$  = intrinsic viscosity

$k$  and  $a$  = Mark-Houwink parameters

$M_v$  = average viscosity molecular weight

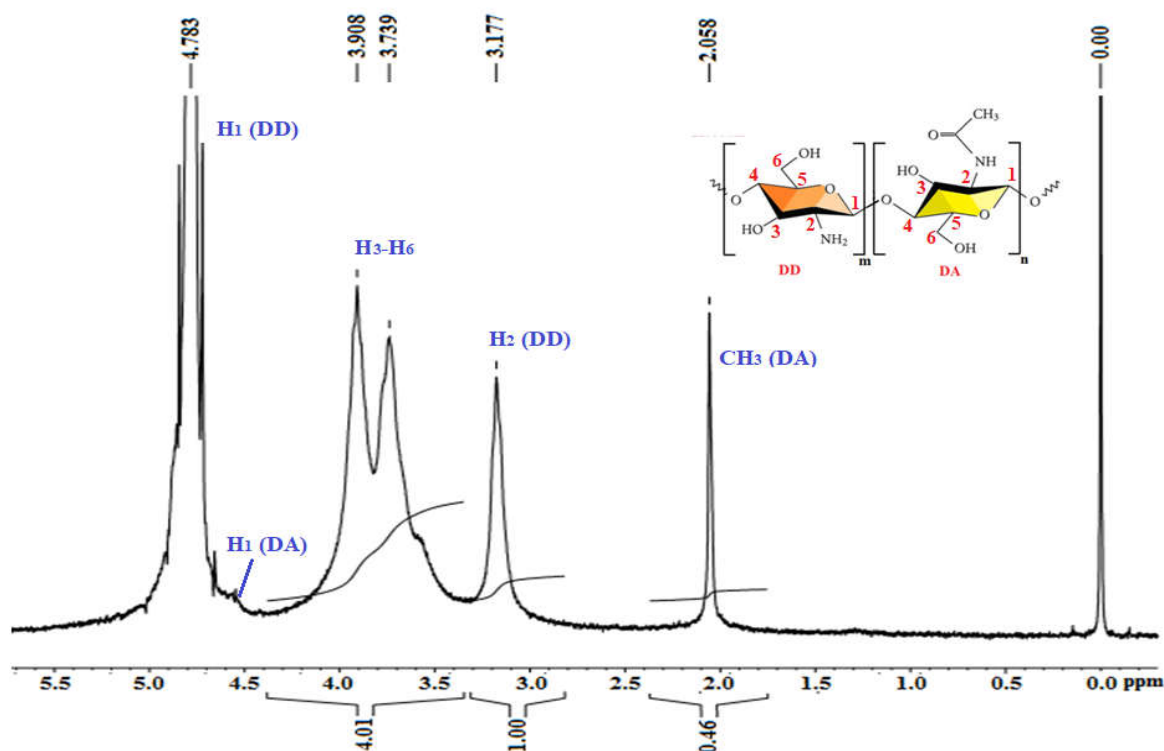

**Figure S1.**  $^1\text{H}$  NMR spectrum of pristine chitosan (CS).

The degree of deacetylation (DD) was calculated by using the integral intensity,  $I_{\text{CH}_3}$ , of the  $\text{CH}_3$  residue, and the sum of integral intensities,  $I_{\text{H}_2\text{-H}_6}$ , of H2, H3, H4, H5 and H6 proton:

$$\text{DD}(\%) = (1 - (I_{\text{CH}_3\text{-DA}}/3)/(I_{\text{H}_2\text{-H}_6}/6)) \cdot 100$$

In our particular case, the degree of deacetylation was calculated as follows:

$$\text{DD} = (1 - (0.46/3)/(5.01/6)) \times 100 = 81.94\%$$

#### Determination of sulfate groups content by back-titration method

The content of sulfate groups was determined by a common back titration method: Shortly, the sulfated titania particles were suspended in a NaOH solution of known concentration and the suspension was stirred for 2 h for neutralization of sulfate groups and filtrated. The unreacted NaOH was titrated with HCl solution in the presence of phenolphthaleine. The content of sulfate groups/g particles was calculated with Equation S1.

$$\text{Sulfate groups content} \left( \frac{\text{mol}}{\text{g}} \right) = (V_{\text{NaOH}} \cdot C_{\text{NaOH}} - V_{\text{HCl}} \cdot C_{\text{HCl}}) / m \quad (\text{S2})$$

where:  $V_{\text{NaOH}}$  (mL) and  $C_{\text{NaOH}}$  (Eq/mL) are the volume, respectively the concentration of NaOH solution used to neutralize the sulfate groups;  $V_{\text{HCl}}$  (mL) and  $C_{\text{HCl}}$  (Eq/mL) are the volume, respectively the concentration of HCl solution used to titrate the reacted NaOH solution;  $m$  (g) is the mass of sulfated titania particles.

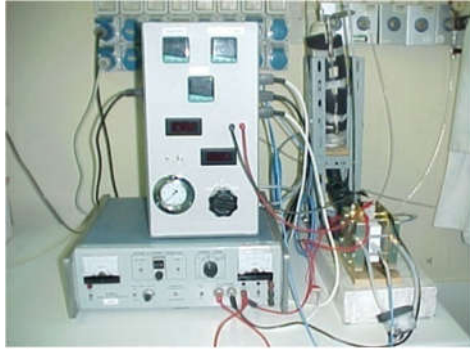

(a)

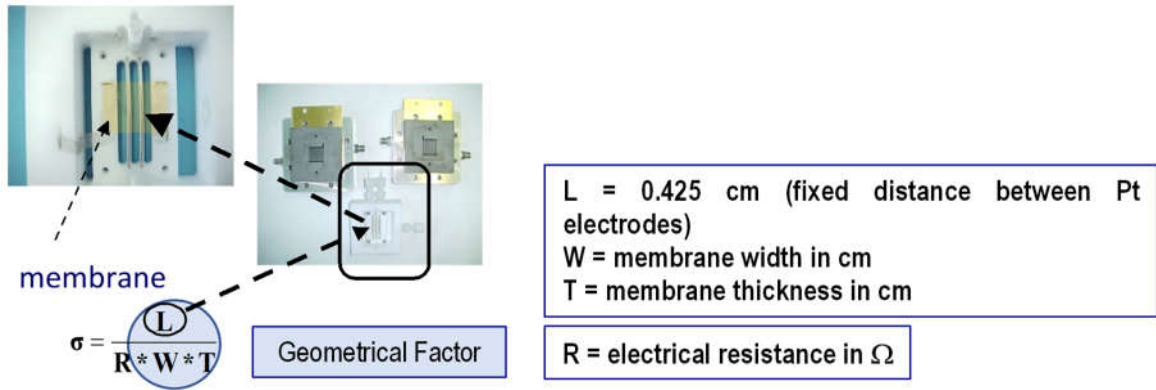

(b)

Figure S2. (a) Test station for proton conductivity measurement connected to cell and potentiostat-galvanostat; (b) conductivity cell and formula used.

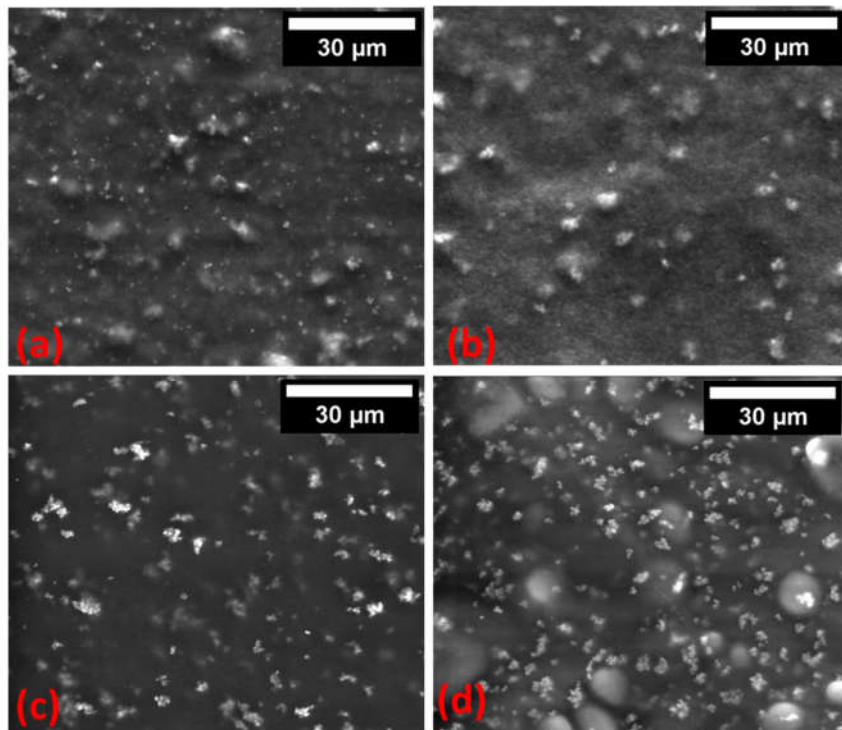

**Figure S3.** Representative surface SEM images of (a) composite chitosan – sulfonated titania membrane (CS-TS) and composite chitosan – sulfonated titania membranes cross-linked with (b) sulfuric acid, (c) pentasodium tripolyphosphate and (d) polydimethylsiloxane (CS-TS-HS, CS-TS-TPP and CS-TS-PDMS, respectively).

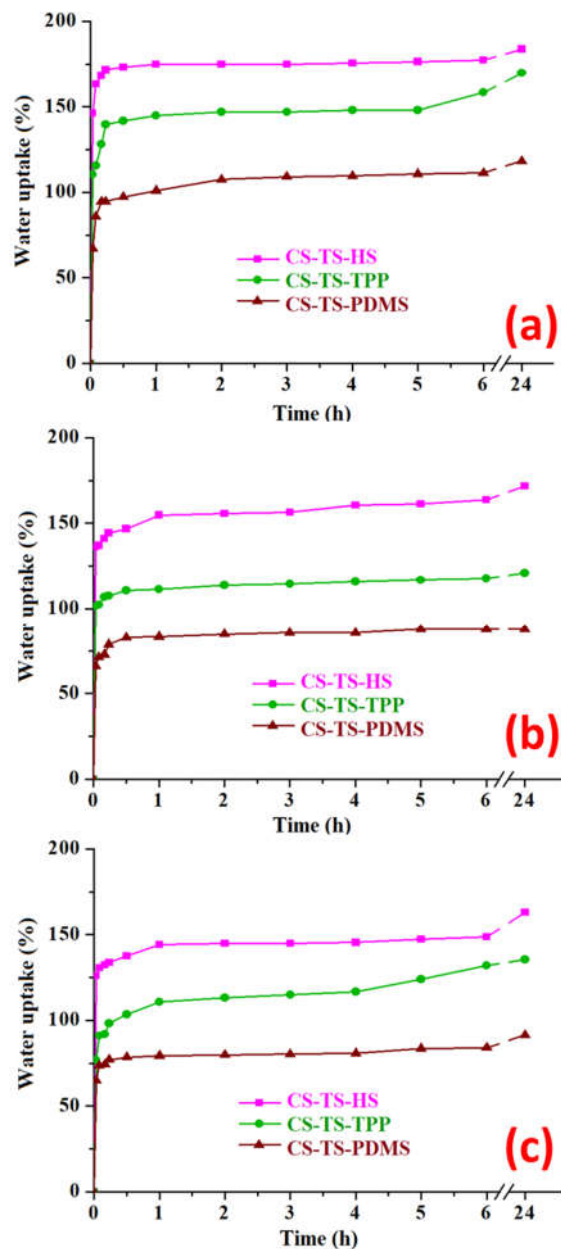

**Figure S4.** Water uptake kinetics of composite chitosan – sulfonated titania membranes cross-linked with sulfuric acid, pentasodium tripolyphosphate and polydimethylsiloxane (CS-TS-HS, CS-TS-TPP and CS-TS-PDMS, respectively) at (a) 25°C, (b) 60°C and (c) 80°C.

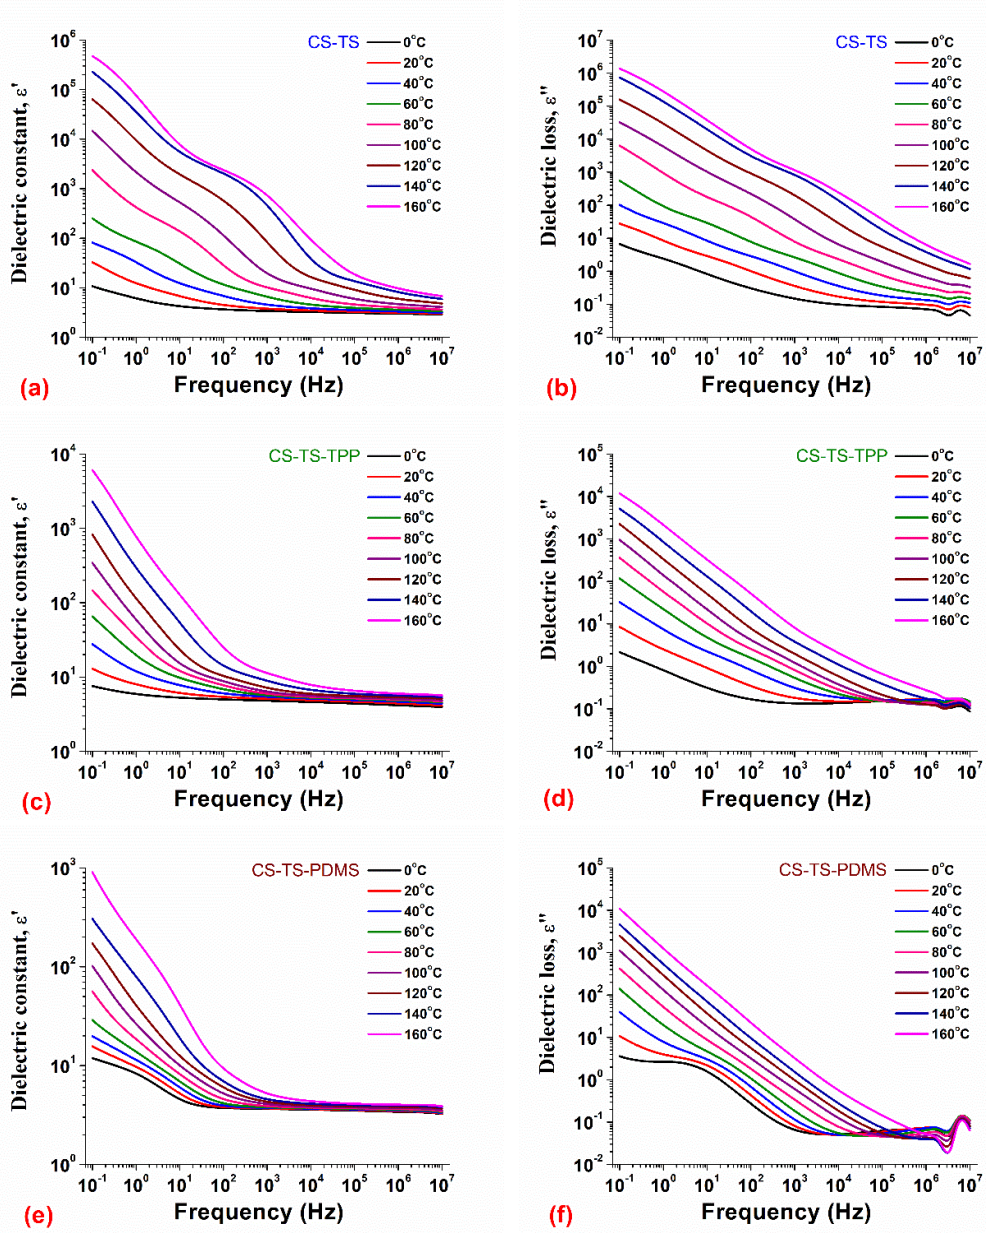

**Figure S5.** Dielectric constant (a,c,e) and dielectric loss (b,d,f) evolution with frequency for dry CS-TS, CS-TS-TPP and CS-TS-PDMS composite membranes.

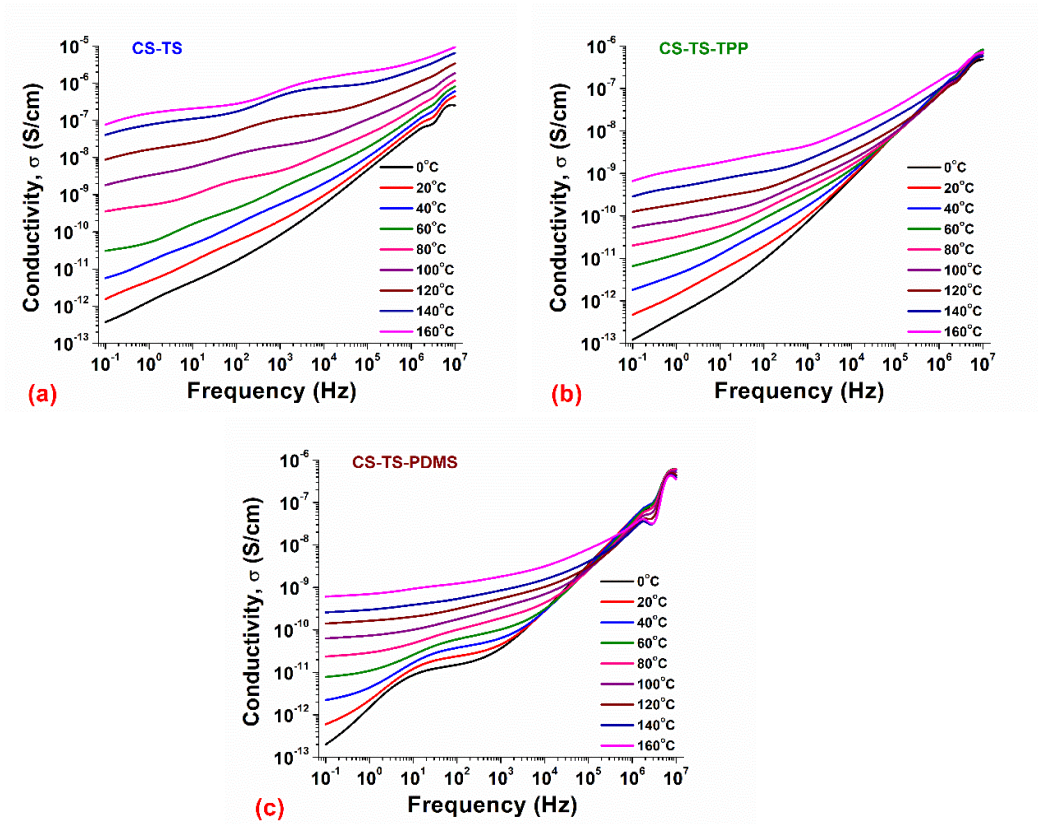

Figure S6. Evolutions of the measured conductivity with frequency for dry (a) CS-TS, (b) CS-TS-TPP and (c) CS-TS-PDMS composite membranes.

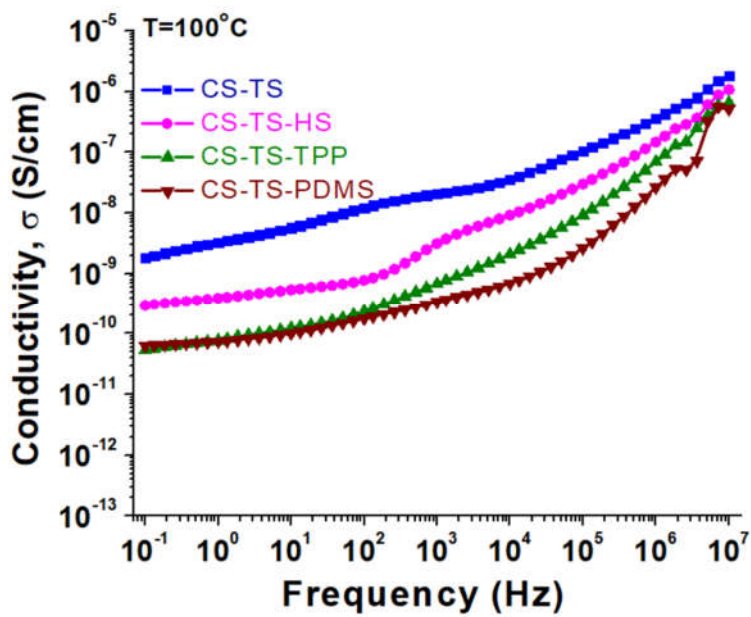

Figure S7. The evolution of conductivity with frequency at 100°C for dry membranes.

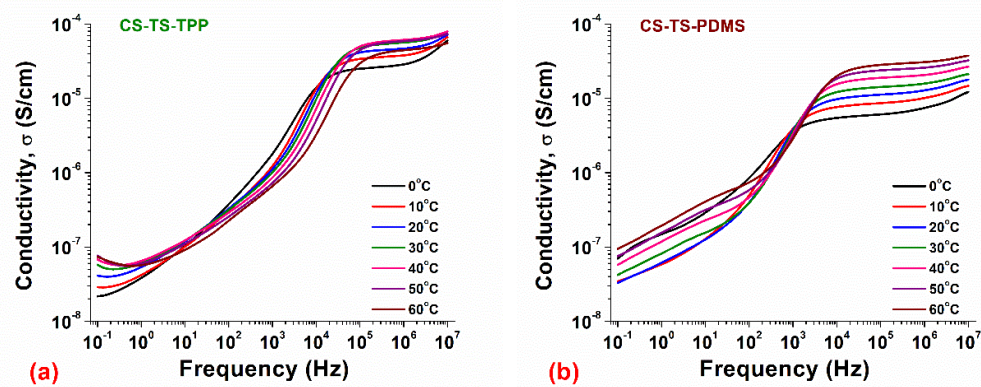

**Figure S8.** Evolutions of the measured conductivity with frequency for hydrated (a) CS-TS-TPP and (b) CS-TS-PDMS composite membranes.

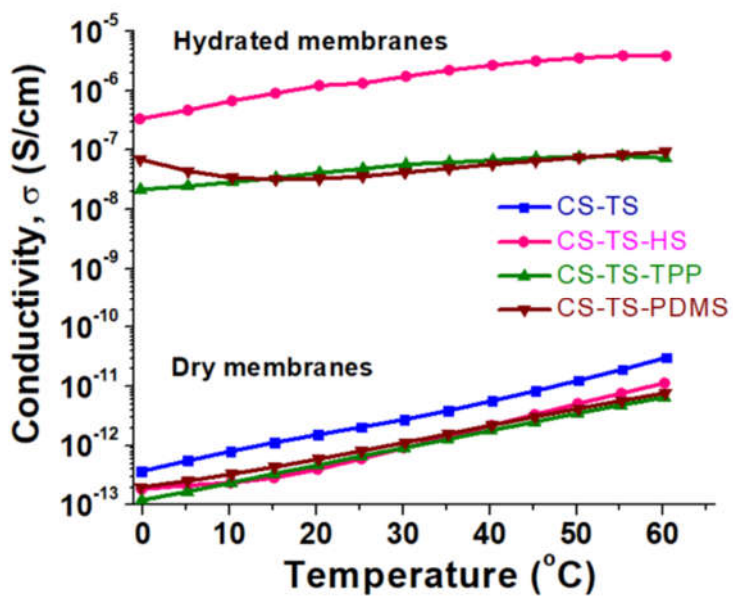

**Figure S9.** The evolution of conductivity with temperature at 0.1 Hz for dry and hydrated membranes.
